# Supplementary material for: Applying fecal microbiota transplantation (FMT) to treat recurrent Clostridium difficile infections (rCDI) in children
Source: PeerJ. 2018 May 30;6:e4663. doi: 10.7717/peerj.4663 (PMC5984579; doi:10.7717/peerj.4663)
Supplement: Data S1 — Worksheets contain the relational database of the study participants (de-identified of names and dates) along with the demographic, past medical history, and relevant antimicrobial therapy received. [file peerj-06-4663-s002.xls]

## Sheet: Summary
ID Number	IBD	Ulcerative Colitis	Crohn's Disease	Sex	Race	Weight (kg)	Number of Antibiotic courses	Number of hospitalizations (How far back?)	Number of ED visits (For C. Diff?)	Abdominal pain	Frequency of stools (When?)	Consistency of stools	GI Bleeding	Fever	Prior C.Diff	Underlying Conditions	Immunizations up to date?	Drug Allergies? List	# of Antibiotics taken in past 12 months?	# of ED visits in past 12 months for any reason	#of ED visits in past month for C.diff infection in past 12 months	Prior C.diff infections? If yes dates	Any Chronic Conditions? List	Comments
FMT-001	No	No	No	F	Black or African American, White	13.7	4	1	1	no	8x a day	formed	no	no	yes	Disorder: g-tube, Premature birth, GERD (gastroesophageal reflux disease)	Yes	No	4	1	1	Yes	chronic diarrhea, feeding difficulty, oral aversion
FMT-004	No	No	No	M	Black or African American, White	26.535	3	0	1	yes	8-9x a day	loose	no	yes	yes	Chilaiditi syndrome, Raschbaum with cecostomy tube placement	Yes	Augmentin, Ciloxan, Keflex	3	4	1	Yes	Diarrhea, asthma
FMT-009	No	No	No	F	White	33.57	2	0	4	yes	10x a day	formed	no	no	yes	Chronic lung disease, Parainfluenza infection, GERD, Recurrent pneumonia, Bronchiectasis	Yes	Yes - Bactrim, albuterol, ciprofloxacin, omnicef	2	4	0	Yes	GERD, Chronic lung disease
FMT-010	No	No	No	F	White	11.96	2	0	0	yes	5x a day	loose, foul smell with mucus	no	yes	yes	Spina bifida, Hydrocephalus, Neurogenic bladder	No	No	2	1	1	Yes	Myelomeningocela, Ventriculomegaly
FMT-011	No	No	No	F	White, American Indian or Alaska Native	22.68	2	0	0	yes	2-7x a day	loose/diarrhea	yes	no	yes	Tourette's syndrome, ADHD, Clostridium difficile colitis, Perforated appendicitis, Postoperative intra-abdominal abscess	Yes	No	2	0	0	Yes	ADHD, Gilles de la Tourette's Syndrome
FMT-012	No	No	No	M	White	11.88	2	3	3	yes	6-7x a day	foul smell, green mucousy stools	no	no	yes	Constipation, Sensitive skin	Yes	Yes- Amoxicillin, Suprax	2	3	3	Yes	Abdominal Distension
FMT-014	No	No	No	F	White	51.4	7	0	2	yes	3	non-formed	no	no	yes	Migraine	Yes	No	7 courses	2	2	Yes	tired and exhausted	She does not have any other diagnosis except c diff at this time. Mom is going to take her to another doctor for her tiredness and headaches
FMT-015	No	No	No	M	White	39.83	1	0	0	yes - daily	2x a day	some solid some loose	no	no	yes	N/A	Yes	No	1	0	0	Yes
FMT-002	Yes	Yes	No	M	Black or African American	20.78	1	4	2	yes	4x a day	diarrhea	yes	yes	yes	Ulcerative colitis, Irritable bowel syndrome, Environmental allergies	Yes	Penicillin	1	7	2	Yes	IBD
FMT-003	Yes	Yes	No	F	White	51.256	4	2	2	yes	5-15x a day	loose/watery	no	yes	yes	Ulcerative colitis	Yes	Penicillin	4	3	4	Yes	rcDiff, Ulcerative Colitis, Diarrhea,
FMT-005	Yes	Yes	No	F	Black or African American	36.9	4	2	2	yes	3-5x a day	partially formed	yes	no	yes	Ulcerative colitis, Bloody diarrhea, Abdominal pain, periumbilic	Yes	No	4	6	2	Yes	Ulcerative colitis, Bloody diarrhea, Abdominal pain, periumbilic
FMT-006	Yes	Yes	No	M	Black or African American	21.4	8	5	5	yes	10-12x a day	watery	no	no	yes	Ulcerative colitis, Autism spectrum disorder, Anemia, unspecified, Autism disorder, Hyponatremia	Yes	No	8	4	5	Yes	Autism, Ulcerative Colitis
FMT-007	No	No	No	M	White	11.2	4	0	0	yes	4-5x a day	loose/foul smelling	no	no	yes	Pancreatitis	Yes	No	4	0	0	Yes	Eczema
FMT-008	Yes	No	Yes	F	White	27.44	2	4	3	yes	2x a day	no mucus	no	no	yes	Crohn's disease	Yes	Yes - Benadryl	2	3	2	Yes	Crohn's Disease, IBD
FMT-013	No	No	No	M	Black or African American, White	13.2	1	3	3	yes	2-3x a day	watery	no	yes	yes	Unspecified otitis media , Sensorineural hearing loss, bilateral , (inpatient new diagnosis documented) ulcerative colitis;Chromosomal anomalies, Rectal bleeding, Diarrhea, Vomiting, Upper airway resistance syndrome	Yes	No	3	3	2	Yes	Sleep Apnea, Congenital Micrognathia

## Sheet: IBD Summary
ID Number	Active Disease at/around time of FMT	IBD	Ulcerative Colitis	Crohn's Disease	Sex	Race	Age at Transplant	Date of Transplant	Weight (kg)	Number of Antibiotic courses	Number of hospitalizations (12 months)	Number of ED visits (For C. Diff?)	Abdominal pain	Frequency of stools (When?)	Consistency of stools	GI Bleeding	Fever	Prior C.Diff	Underlying Conditions	Immunizations up to date?	Drug Allergies? List	# of Antibiotics taken in past 12 months?	Estimated Date of use, name of abx, type of infection	# of ED visits in past 12 months for any reason	#of ED visits in past month for C.diff infection in past 12 months	Prior C.diff infections? If yes dates	Any Chronic Conditions? List
FMT-002	Yes (on MTX and Infliximab)	Yes	Yes	No	M	Black or African American	7	2015-01-21	20.78	1	4	2	yes	4x a day	diarrhea	yes	yes	yes	Ulcerative colitis, Irritable bowel syndrome, Environmental allergies	Yes	Penicillin	1	9/25/2014 - 10 day course of Flagyl - CDI	7	2	Yes	IBD
FMT-003	No	Yes	Yes	No	F	White	16	2015-02-02	51.256	4	2	2	yes	5-15x a day	loose/watery	no	yes	yes	Ulcerative colitis	Yes	Penicillin	4	8/4/2014 - Flagyl - CDI	3	4	Yes	rcDiff, Ulcerative Colitis, Diarrhea,
FMT-005	Yes (Solumedrol and Imuran)	Yes	Yes	No	F	Black or African American	10	2015-03-02	36.9	4	2	2	yes	3-5x a day	partially formed	yes	no	yes	Ulcerative colitis, Bloody diarrhea, Abdominal pain, periumbilic	Yes	No	4	Vancomycin, Flagyl	6	2	Yes	Ulcerative colitis, Bloody diarrhea, Abdominal pain, periumbilic
FMT-006	No	Yes	Yes	No	M	Black or African American	8	2015-03-19	21.4	8	5	5	yes	10-12x a day	watery	no	no	yes	Ulcerative colitis, Autism spectrum disorder, Anemia, unspecified, Autism disorder, Hyponatremia	Yes	No	8	Vancomycin, Flagyl	4	5	Yes	Autism, Ulcerative Colitis
FMT-008	Yes (Vedolizumab, MTX)	Yes	No	Yes	F	White	7	2015-05-15	27.44	2	4	3	yes	2x a day	no mucus	no	no	yes	Crohn's disease	Yes	Yes - Benadryl	2	Augmentin, Vancomycin, Keflex	3	2	Yes	Crohn's Disease, IBD

## Sheet: Past History 
ID Number	Sex	Ethnicity	Race/Ethnicity	Insurance	Weight (kg)	Number of Antibiotic courses	Number of hospitalizations (How far back?)	Number of ED visits (For C. Diff?)	Abdominal pain	Frequency of stools (When?)	Consistency of stools	GI Bleeding	Fever	Prior C.Diff	Underlying Conditions	Race/Ethnicity	Immunizations up to date?	Drug Allergies? List	# of Antibiotics taken in past 12 months?	Estimated Date of use, name of abx, type of infection	# of ED visits in past 12 months for any reason	#of ED visits in past month for C.diff infection in past 12 months	Prior C.diff infections? If yes dates	Any Immune deficienices? List	Any Chronic Conditions? List	Comments
FMT-001	F	Non Hispanic	Black or African American, White	BLUE CROSS / BLUE CHOICE HMO	13.7	4	1	1	no	8x a day	formed	no	no	yes	Disorder: g-tube, Premature birth, GERD (gastroesophageal reflux disease)	Black or African American, White	Yes	No	4	Vancomycin (100mg) for 3 weeks prior to transplant Flagyl	1	1	Yes		chronic diarrhea, feeding difficulty, oral aversion
FMT-002	M	Non Hispanic	Black or African American	BLUE CROSS / BLUE CHOICE POS	20.78	1	4	2	yes	4x a day	diarrhea	yes	yes	yes	Ulcerative colitis, Irritable bowel syndrome, Environmental allergies	Black or African American	Yes	Penicillin	1	9/25/2014 - 10 day course of Flagyl - CDI	7	2	Yes		IBD
FMT-003	F	Non Hispanic	White	UNITED / UNITED EPO/SELECT/CHOICE	51.256	4	2	2	yes	5-15x a day	loose/watery	no	yes	yes	Ulcerative colitis	White	Yes	Penicillin	4	8/4/2014 - Flagyl - CDI	3	4	Yes		rcDiff, Ulcerative Colitis, Diarrhea,
FMT-004	M	Non Hispanic	Black or African American, White	PEACHSTATE / PEACHSTATE PCARE CMO	26.535	3	0	1	yes	8-9x a day	loose	no	yes	yes	Chilaiditi syndrome, Raschbaum with cecostomy tube placement	Black or African American, White	Yes	Augmentin, Ciloxan, Keflex	3	Vancomycin, Flagyl, - CDI Clindamycin ED - wound infection	4	1	Yes		Diarrhea, asthma
FMT-005	F	Non Hispanic	White	KAISER / KAISER PERMANENTE HMO	36.9	4	2	2	yes	3-5x a day	partially formed	yes	no	yes	Ulcerative colitis, Bloody diarrhea, Abdominal pain, periumbilic	Black or African American	Yes	No	4	Vancomycin, Flagyl	6	2	Yes		Ulcerative colitis, Bloody diarrhea, Abdominal pain, periumbilic
FMT-006	M	Non Hispanic	Black or African American	MEDICAID / MEDICAID	21.4	8	5	5	yes	10-12x a day	watery	no	no	yes	Ulcerative colitis, Autism spectrum disorder, Anemia, unspecified, Autism disorder, Hyponatremia	Black or African American	Yes	No	8	Vancomycin, Flagyl	4	5	Yes		Autism, Ulcerative Colitis
FMT-007	M	Non Hispanic	White	AMERIGROUP / AMERIGROUP MEDICAID CMO	11.2	4	0	0	yes	4-5x a day	loose/foul smelling	no	no	yes	Ulcerative colitis, Pancreatitis	White	Yes	No	4	9/23/2014 - Vancomycin (100mg) TID, Flagyl	0	0	Yes		Eczema
FMT-008	F	Non Hispanic	White	GREAT WEST / GREAT WEST HMO/POS/OPEM	27.44	2	4	3	yes	2x a day	no mucus	no	no	yes	Crohn's disease	White	Yes	Yes - Benadryl	2	Augmentin, Vancomycin, Keflex	3	2	Yes		Crohn's Disease, IBD
FMT-009	F	Non Hispanic	White	MEDICAID / MEDICAID	33.57	2	0	4	yes	10x a day	formed	no	no	yes	Chronic lung disease, Parainfluenza infection, GERD, Recurrent pneumonia, Bronchiectasis	White	Yes	Yes - Bactrim, albuterol, ciprofloxacin, omnicef	2	Tobramycin, Nystatin, Rocephin, Clindamycin, Vancomycin	4	0	Yes		GERD, Chronic lung disease
FMT-010	F	Non Hispanic	White	FIRST HEALTH / ASSURANT HEALTHCARE	11.96	2	0	0	yes	5x a day	loose, foul smell with mucus	no	yes	yes	Spina bifida, Hydrocephalus, Neurogenic bladder	White	No	No	2	Keflex	1	1	Yes		Myelomeningocela, Ventriculomegaly
FMT-011	F	Non Hispanic	White, American Indian or Alaska Native	MEDICAID / MEDICAID	22.68	2	0	0	yes	2-7x a day	loose/diarrhea	yes	no	yes	Tourette's syndrome, ADHD, Clostridium difficile colitis, Perforated appendicitis, Postoperative intra-abdominal abscess	White, American Indian or Alaska Native	Yes	No	2	Vancomycin (4/228/2015 - cDiff), Penicillin (5/12/2015 - strep)	0	0	Yes		ADHD, Gilles de la Tourette's Syndrome
FMT-012	M	Non Hispanic	White	UNITED / UNITED EPO/SELECT/CHOICE	11.88	2	3	3	yes	6-7x a day	foul smell, green mucousy stools	no	no	yes	Constipation, Sensitive skin	White	Yes	Yes- Amoxicillin, Suprax	2	Flagyl - 2014, CDI Flagyl - 4/14/2015, CDI, 5/4/2015 - Vancomycin 4/30/2015 - Flagyl 5/24/2015 - Vancomycin (3mL - TID) 6/23/2015 - Vancomycin (TID)	3	3	Yes		Abdominal Distension
FMT-013	M	Non Hispanic	Black or African American, White	MEDICAID / MEDICAID	13.2	1	3	3	yes	2-3x a day	watery	no	yes	yes	Unspecified otitis media , Sensorineural hearing loss, bilateral , (inpatient new diagnosis documented) ulcerative colitis;Chromosomal anomalies, Rectal bleeding, Diarrhea, Vomiting, Upper airway resistance syndrome	Black or African American, White	Yes	No	3	Vancomycin(250mg Q8h) - CDI Ciprodex - ear infection 12/25/2014 Alinia - ongoing	3	2	Yes		Sleep Apnea, Congenital Micrognathia
FMT-014	F	Non Hispanic	White	BLUE CROSS	51.4	7	0	2	yes	3	non-formed	no	no	yes	Migraine	White	Yes	No	7 courses	C diff/ Dec2014-present	2	2	Yes	n	n/ tired and exhausted	She does not have any other diagnosis except c diff at this time. Mom is going to take her to another doctor for her tiredness and headaches
FMT-015	M	Non Hispanic	White	CIGNA - CIGNA PPO	39.83	1	0	0	yes - daily	2x a day	some solid some loose	no	no	yes	N/A	White	Yes	No	1	mesalamine (APRISO) 0.375 gram -CDI	0	0	Yes

## Sheet: 24-Hour Phone Call
ID Number	Sex	Abdominal pain	Vomiting	Allergic reaction	GI Bleeding	Fever	Stool	Distension	Intials	Comments
FMT-001	F	No	No	No	No	No	Yes - Once	No	AAM
FMT-002	M	Yes	No	No	No	No	Yes - Once	No	AAM
FMT-003	F
FMT-004	M
FMT-005	F
FMT-006	M	No	No	No	No	Yes	Yes - More form no foul smell	No	AAM
FMT-007	M	No	No	No	No	No	Yes - Occasional loose stools but also formed stools	No	AAM	No complications in first 24 hours
FMT-008	F	yes (same day)	2 (same day)	no	no	no	no	no	SK
FMT-009	F	Yes some	No	No	no	no	Yes- small amount of stool	No	AAM
FMT-010	F	no	no	no	no	no	3-4 diapers in morning after taking ex lax at night	no	SK
FMT-011	F	yes	yes nightly once	no	yes	No	Yes 2-7 stools	Yes	AAM
FMT-012	M	No	No	blister rash	no	Yes - 37.8C	Yes - 12 watery stools	yes	SK
FMT-013	M	No	No	no	no	Yes - 35.6C	Yes - 4 watery stools	no	AAM
FMT-014	F	Yes	No	No	Yes - dime sized	No	Yes - 3 stools	no	AAM	Symptoms were present in varying degrees prior to the FMT
FMT-015	M	Yes - Severe	No	No	No	Yes - 37.8C	No Bowel Movement.	no	AAM	Pateint gets dizzy, and has severe abdominal pain.

## Sheet: 1 Week Phone Call
ID Number	Sex	Abdominal pain	Vomiting	Allergic reaction	GI Bleeding	Fever	Distension	Comments
FMT-001	F	No	No	No	No	No	No	No recent ER visits or hospitalizations (Exact date?)
FMT-002	M	No	No	No	No	No	No	Feels tired and has leg pains
FMT-003	F	No	No	No	No	No	No	Normal pathology results, look great
FMT-004	M	Yes	No	No	No	No	No	Increased stools , up to 10 x/ day and nocturnal stools
FMT-005	F							Left mom voicemail; Instructed to call back
FMT-006	M	Yes	Yes	No	Yes	No	No	2 episodes of vomiting and smelly stools
FMT-007	M	No	No	No	No	Yes - low grade	No	Mom said that he is almost 100%, eating well, playing, and being himself.
FMT-008	F							Not on EPIC
FMT-009	F							Not on EPIC
FMT-010	F							Not on EPIC
FMT-011	F	Yes	Yes	no	no	no	no	Vomiting, has abdominal pain and weakness
FMT-012	M	yes	yes	no	no	yes	yes	Flu like symptoms
FMT-013	M	yes	no	no	Yes - little	no	no	inflammatory bowel
FMT-014	F	Yes	no	no	no	no	no	stomach pain on and off.
FMT-015	M	No	no	no	no	yes - 37.78C	no	Patient is doing much better.

## Sheet: 1 Month Visit
ID Number	Clinic Visit or Contacted	Sex	Weight	Abdominal pain	Vomiting	Allergic reaction	GI Bleeding	Fever	Distension	Comments
FMT-001	Clinic Visit	F	13.70 kg	No	No	No	No	No	No
FMT-002	Clinic Visit	M	21.89 kg	No	No	No	No	No	No
FMT-003	Contacted	F	N/A	No	No	No	No	No	No	Called parent. There was no Follow-up
FMT-004	pending	M								Not on EPIC
FMT-005	Clinic Visit	F	39.92 kg	No	No	No	No	No	No	Remicade infusion
FMT-006	Clinic Visit	M	21.30 kg	Yes	No	Yes	Yes	No	Moderate	lethargic with decreased appetite and stomach pain
FMT-007	Clinic Visit	M	11.57 kg	No	No	No	No	No	No	About 3 stools a week or loose and the rest 7 -10 per week, are solid. No blood. Some foul smelling stools (rare).
FMT-008	Contacted	F	N/A	No	No	No	No	No	No	Called parent. There was no Follow-up
FMT-009	Clinic Visit	F	33.11 kg	Yes	No	No	No	No	No
FMT-010	pending	F								Not on EPIC
FMT-011	Clinic Visit	F	22.50 kg	Yes	No	No	No	No	No
FMT-012	Inpatient	M	12.60 kg	Yes	Yes	No	No	No	Yes	C. Diff again-green, foul-smelling stools and abdominal cramping.
FMT-013	Clinic Visit	M	15.05 kg	No	No	No	No	No	No	Gained weight pt is doing well, no vomiting. Having loose, mushy stools 3-4x
FMT-014	Clinic Visit	F	53.16 kg	Yes	No	No	No	No	No	Abdominal pain has not improved since last visit (11/17/2015).
FMT-015	Clinic Visit	M	40.01 kg	Yes	No	No	Yes	No	No	C/o abdominal pain, headaches and dizziness. BMs are 2x per day. Visible blood in BMs.

## Sheet: 3 Month Visit
ID Number	Clinic Visit or Contacted	Sex	Weight	Abdominal pain	Vomiting	Allergic reaction	GI Bleeding	Fever	Distension
FMT-001	Clinic Visit	F	13.98 kg	No	No	No	No	No	No
FMT-002	Clinic Visit	M	21.68 kg	Mild Cramping	No	No	Yes	No	No
FMT-003	Clinic Visit	F	53.43 kg	No	No	No	No	No	No
FMT-004	Contacted	M
FMT-005	Clinic Visit	F	39.69 kg	Yes - Mild	No	No	Yes	No	No
FMT-006	Clinic Visit	M	21.50 kg	Yes - On/Off	No	No	No	Yes	Yes- minimal
FMT-007	Contacted	M	13.52 kg	No	No	No	No	No	No
FMT-008	Clinic Visit	F	27.10 kg	Yes	No	No	Yes - Once a week	Yes - Low grade	No
FMT-009	Clinic Visit	F	32.99 kg	Yes - Mild	No	No	no	no	no
FMT-010	Clinic Visit	F	14.1 kg	Yes	No	No	No	no	no
FMT-011	Clinic Visit	F	22.23 kg	Yes - Stable	No	Yes- Focalyn and Zoloft	no	no	no
FMT-011	Clinic Visit	F	24.13 kg	Yes - 1x every 2 weeks	No	No	No	No	No
FMT-012	Clinic Visit	M	12.96 kg	Yes	No	No	No	No	Yes
FMT-013	Clinic Visit	M	15.79 kg	Yes	No	No	No	No	No
FMT-014	pending	F
FMT-015	Clinic Visit	M	40.69 kg	Yes - Daily	No	No	No	Sometimes - low grade	Some

## Sheet: rCDI Dates
ID Number	Treatment Type	Treatment Type	Treatment Type	Comments
FMT-001	Vancomycin & Flagyl	Vancomycin	N/A	4 CDI
FMT-002	Flagyl	Vancomycin	Vancomycin	3 CDI
FMT-003	Flagyl	Vancomycin		4 CDI
FMT-004	Flagyl	Vancomycin	Vancomycin	3 CDI
FMT-005	Flagyl	Flagyl	Flagyl/Vancomycin	3 CDI
FMT-006	Vancomycin	Flagyl	Flagyl/Vancomycin	3 CDI
FMT-007	Flagyl	Vancomycin	Flagyl/Vancomycin	4 CDI
FMT-008	Vancomycin	Vancomycin	Vancomycin	3 CDI
FMT-009	Vancomycin	Flagyl		2 CDI
FMT-010	Flagyl	Flagyl	Flagyl	3 CDI
FMT-011	Flagyl	Vancomycin	Unknown	5+ CDI
FMT-012	Vancomycin			2 CDI Flagyl - 2014, CDI Flagyl - 4/14/2015, CDI, 5/4/2015 - Vancomycin 4/30/2015 - Flagyl 5/24/2015 - Vancomycin (3mL - TID) 6/23/2015 - Vancomycin (TID)
FMT-013		Flagyl	Flagyl	3 CDI
FMT-014	Vancomycin	Flagyl	Flagyl	3 CDI
FMT-015	Flagyl	Vancomycin		3 CDI
