# Supplementary material for: Applying fecal microbiota transplantation (FMT) to treat recurrent Clostridium difficile infections (rCDI) in children
Source: PeerJ. 2018 May 30;6:e4663. doi: 10.7717/peerj.4663 (PMC5984579; doi:10.7717/peerj.4663)
Supplement: Table S1 — Wilcoxon signed rank test was performed for changes in genera average relative abundance values for all pair combination of FMT statuses. Any genus not found it at least 10% of the samples was removed from analysis. P-values were controlled for multiple hypothesis testing using Benjamini-Hochberg adjustment and adjusted p-value <0.05 was deemed to be significant. NS, Non-significant. [file peerj-06-4663-s001.xlsx]

## Sheet: Sheet1
Genus	Average percent relative abundance			Adjusted p-value
	PreFMT	PostFMT	Donor	Pre vs post	Pre vs donor	Donor vs post
p__Bacteroidetes;c__Bacteroidia;o__Bacteroidales;f__Porphyromonadaceae;g__Parabacteroides	0.00683266	4.69363	6.67809	0.00457474	2.44377e-06	NS (0.559207218649943)
p__Bacteroidetes;c__Bacteroidia;o__Bacteroidales;f__[Barnesiellaceae];g__	0.00254869	1.39147	2.10461	NS (0.126970665016557)	2.44377e-06	NS (0.204539651156688)
p__Firmicutes;c__Clostridia;o__Clostridiales;f__Ruminococcaceae;g__Faecalibacterium	0.0797686	1.44983	5.73191	0.0342854	2.44377e-06	0.0179238
p__Firmicutes;c__Clostridia;o__Clostridiales;f__Veillonellaceae;g__Veillonella	11.2956	0.155052	0.090437	0.000140761	2.44377e-06	NS (0.718886588451805)
p__Proteobacteria;c__Gammaproteobacteria;o__Enterobacteriales;f__Enterobacteriaceae;g__	32.8493	6.08101	0.565389	0.0119334	8.79757e-05	0.490933
p__Firmicutes;c__Erysipelotrichi;o__Erysipelotrichales;f__Erysipelotrichaceae;g__Holdemania	0.000108455	0.0219005	0.040703	0.0164527	0.000123258	0.032335
p__Bacteroidetes;c__Bacteroidia;o__Bacteroidales;f__Rikenellaceae;g__	0.00233178	2.78436	0.53946	0.00733374	0.000159829	NS (0.889650520584349)
p__Firmicutes;c__Clostridia;o__Clostridiales;f__Lachnospiraceae;g__Anaerostipes	0.00162682	0.0313016	0.240499	0.119183	0.000159829	NS (0.0815835688072649)
p__Firmicutes;c__Clostridia;o__Clostridiales;f__Ruminococcaceae;Other	0.000596502	0.229757	0.120035	0.00733374	0.000159829	NS (0.416833493055227)
p__Bacteroidetes;c__Bacteroidia;o__Bacteroidales;f__[Odoribacteraceae];g__Odoribacter	0.000650729	0.987272	0.285351	0.0338296	0.000190112	NS (0.552231477001739)
p__Proteobacteria;c__Gammaproteobacteria;o__Enterobacteriales;f__Enterobacteriaceae;Other	0.40817	0.00662048	0.000733614	0.00733374	0.000190112	NS (0.422001185816687)
p__Firmicutes;c__Clostridia;o__Clostridiales;f__Ruminococcaceae;g__	0.759076	2.08982	5.14598	0.0417826	0.000221568	0.0477997
p__Firmicutes;c__Clostridia;o__Clostridiales;f__Ruminococcaceae;g__Ruminococcus	0.424655	0.907403	2.72391	0.0187623	0.00028047	0.0351751
p__Firmicutes;c__Clostridia;o__Clostridiales;f__Christensenellaceae;g__Christensenella	0	0.0273558	0.00295975	0.00457474	0.0003411	NS (0.475452854098654)
p__Firmicutes;c__Clostridia;o__Clostridiales;f__[Mogibacteriaceae];g__	0.00271137	0.121446	0.0277256	0.00800323	0.000408292	NS (0.974789743579285)
p__Bacteroidetes;c__Bacteroidia;o__Bacteroidales;f__Bacteroidaceae;g__Bacteroides	6.52714	39.2301	48.8608	0.0229491	0.000416052	NS (0.442339528192888)
p__Firmicutes;c__Clostridia;o__Clostridiales;f__Lachnospiraceae;g__Lachnospira	0.516028	0.247791	2.86623	NS (0.889203417398141)	0.000521529	0.00441853
p__Tenericutes;c__Mollicutes;o__RF39;f__;g__	0	0.00993072	0.0800652	NS (0.509176126220142)	0.00077092	0.032335
p__Proteobacteria;c__Deltaproteobacteria;o__Desulfovibrionales;f__Desulfovibrionaceae;g__Bilophila	0.0498892	0.274035	0.238602	NS (0.169305980462123)	0.00118042	NS (0.439753712668639)
p__Firmicutes;c__Clostridia;o__Clostridiales;f__Ruminococcaceae;g__Anaerotruncus	0.001193	0.11758	0.00627367	0.0338296	0.00170731	NS (0.55831792444986)
p__Proteobacteria;c__Gammaproteobacteria;o__Enterobacteriales;f__Enterobacteriaceae;g__Escherichia	0.0249446	0.0052699	0.0017455	NS (0.0776092387473987)	0.00170731	NS (0.165306863395885)
p__Proteobacteria;c__Gammaproteobacteria;o__Enterobacteriales;f__Enterobacteriaceae;g__Trabulsiella	0.342663	0.00124465	0.000328862	0.0229491	0.00305788	NS (0.55831792444986)
p__Proteobacteria;c__Gammaproteobacteria;o__Pasteurellales;f__Pasteurellaceae;g__	0.0370916	0.00635566	0.000581832	0.0360776	0.00305788	NS (0.846826364354931)
p__Cyanobacteria;c__4C0d-2;o__YS2;f__;g__	0.000542274	0.0096659	0.118466	NS (0.614775753753059)	0.00310164	0.032335
p__Proteobacteria;c__Betaproteobacteria;o__Neisseriales;f__Neisseriaceae;g__Eikenella	0.137521	0.104709	7.58912e-05	NS (0.182880200143124)	0.0034961	NS (0.288854547841979)
p__Actinobacteria;c__Coriobacteriia;o__Coriobacteriales;f__Coriobacteriaceae;g__Adlercreutzia	0	0.0116785	0.00672902	0.0229491	0.00357858	1
p__Firmicutes;c__Clostridia;o__Clostridiales;f__Dehalobacteriaceae;g__Dehalobacterium	0	0.00487267	0.0025803	NS (0.180890628832904)	0.00357858	NS (0.170767912024947)
p__Proteobacteria;c__Gammaproteobacteria;o__Enterobacteriales;f__Enterobacteriaceae;g__Citrobacter	8.91288	0.0758707	0.00328862	NS (0.107446511746933)	0.00470887	NS (0.779924384970356)
p__Actinobacteria;c__Coriobacteriia;o__Coriobacteriales;f__Coriobacteriaceae;g__	0.00488047	0.0324933	0.0326332	NS (0.0733683252819186)	0.00785616	0.552231
p__Cyanobacteria;c__Chloroplast;o__Streptophyta;f__;g__	0.00021691	0.000317783	0.00478114	NS (0.963464875810378)	0.00785616	0.0470101
p__Firmicutes;c__Clostridia;o__Clostridiales;f__Christensenellaceae;g__	0.000325365	0.351627	0.0205159	0.0087056	0.00785616	NS (0.816774548806851)
p__Firmicutes;c__Erysipelotrichi;o__Erysipelotrichales;f__Erysipelotrichaceae;g__Clostridium	0.00444665	7.94457e-05	0	NS (0.0776092387473987)	0.00880988	NS (0.490932634460136)
p__Proteobacteria;c__Gammaproteobacteria;o__Enterobacteriales;f__Enterobacteriaceae;g__Klebsiella	0.0107913	7.94457e-05	0	NS (0.0841817543320998)	0.00880988	NS (0.490932634460136)
p__Firmicutes;c__Clostridia;o__Clostridiales;f__Lachnospiraceae;g__Roseburia	1.02409	0.903086	3.39332	NS (0.174646954205744)	0.00905091	NS (0.22181690372564)
p__Bacteroidetes;c__Bacteroidia;o__Bacteroidales;Other;Other	0	0.000820939	0.00280797	NS (0.126970665016557)	0.0149066	NS (0.442339528192888)
p__Actinobacteria;c__Coriobacteriia;o__Coriobacteriales;f__Coriobacteriaceae;g__Collinsella	5.42274e-05	0.0824117	0.0378444	0.0229491	0.0154332	NS (0.484584594004843)
p__Firmicutes;c__Bacilli;o__Lactobacillales;f__Enterococcaceae;Other	0.00699534	0.000370747	0	0.174945	0.0206882	0.490933
p__Proteobacteria;c__Gammaproteobacteria;o__Enterobacteriales;f__Enterobacteriaceae;g__Morganella	0.0210402	7.94457e-05	5.05941e-05	NS (0.0841817543320998)	0.0260969	NS (0.928087483044989)
p__Firmicutes;c__Clostridia;Other;Other;Other	0	0.00338968	0.00723496	0.509176	0.0293888	0.251617
p__Proteobacteria;c__Gammaproteobacteria;o__Enterobacteriales;f__Enterobacteriaceae;g__Proteus	0.932875	0.0246811	0.000607129	NS (0.297916027135651)	0.0299457	NS (0.490932634460136)
p__Firmicutes;c__Clostridia;o__Clostridiales;f__Veillonellaceae;g__Acidaminococcus	0.000488047	0.263071	0.763212	NS (0.161764660799355)	0.0347379	NS (0.687744612772183)
p__Actinobacteria;c__Actinobacteria;o__Actinomycetales;f__Corynebacteriaceae;g__Corynebacterium	0.00103032	0.000529638	0	NS (0.57520163425564)	0.0435671	NS (0.242080529260237)
p__Firmicutes;c__Clostridia;o__Clostridiales;f__Veillonellaceae;Other	0.0113335	0.000953349	0.00184668	NS (0.963464875810378)	0.0435671	NS (0.0937819844470934)
p__Firmicutes;c__Erysipelotrichi;o__Erysipelotrichales;f__Erysipelotrichaceae;Other	0.0371458	0.00328376	2.52971e-05	NS (0.240318554907935)	0.0435671	NS (0.490932634460136)
p__Firmicutes;c__Clostridia;o__Clostridiales;f__Lachnospiraceae;g__Coprococcus	0.377803	0.47588	0.715856	NS (0.416673501936659)	0.0443993	0.032335
p__Firmicutes;c__Bacilli;o__Lactobacillales;f__Enterococcaceae;g__Enterococcus	0.351014	0.388119	0.000657723	NS (0.291213224269532)	0.0454219	NS (0.462344684599232)
p__Actinobacteria;c__Coriobacteriia;o__Coriobacteriales;f__Coriobacteriaceae;g__Slackia	0	0.00436951	0.00842392	NS (0.306885871532801)	0.049375	NS (0.552231477001739)
p__Firmicutes;c__Clostridia;o__Clostridiales;f__Peptococcaceae;g__rc4-4	0	0	0.0051606	NA	0.049375	NS (0.148824968930545)
p__Lentisphaerae;c__[Lentisphaeria];o__Victivallales;f__Victivallaceae;g__	0	0.000105928	0.00586892	NS (0.509176126220142)	0.049375	NS (0.251617187062503)
p__Actinobacteria;c__Coriobacteriia;o__Coriobacteriales;f__Coriobacteriaceae;g__Eggerthella	0.00634461	0.25179	0.00366807	0.0137837	NS (0.543470017753232)	0.0107034
p__Firmicutes;c__Clostridia;o__Clostridiales;f__;g__	1.68951	0.715012	2.51422	NS (0.776865625776492)	NS (0.142467224756853)	0.032335
p__Proteobacteria;c__Betaproteobacteria;o__Burkholderiales;f__Alcaligenaceae;g__Sutterella	2.65167	0.792948	3.02894	NS (0.98366157007199)	NS (0.293444286818504)	0.0477997
p__Proteobacteria;c__Gammaproteobacteria;o__Pasteurellales;f__Pasteurellaceae;g__Haemophilus	4.47821	0.160772	0.318237	0.0205471	NS (0.051223617118364)	NS (0.148824968930545)
p__Bacteroidetes;c__Bacteroidia;o__Bacteroidales;f__Porphyromonadaceae;g__Porphyromonas	0.000596502	0.0587634	0.000480644	0.0229491	NS (0.377053060838727)	NS (0.143795398548718)
p__Cyanobacteria;c__Chloroplast;o__CAB-I;f__;g__	0.000650729	2.64819e-05	0.000354159	0.0360776	NS (0.492136959310009)	NS (0.337771324325165)
